1 **The major subunit of widespread competence (pseudo)pili exhibits a novel and**  
2 **conserved type IV pilin fold**

3

4 Devon Sheppard<sup>1</sup>, Jamie-Lee Berry<sup>1</sup>, Rémi Denise<sup>2,3</sup>, Eduardo P. C. Rocha<sup>2</sup>,  
5 Stephen J. Matthews<sup>4</sup> and Vladimir Pelicic<sup>1,\*</sup>

6

7 <sup>1</sup>MRC Centre for Molecular Bacteriology and Infection, Imperial College London,  
8 London SW7 2AZ, United Kingdom

9

10 <sup>2</sup>Microbial Evolutionary Genomics, Institut Pasteur, CNRS, UMR3525, Paris 75015,  
11 France

12

13 <sup>3</sup>Sorbonne Université, Collège doctoral, Paris 75005, France

14

15 <sup>4</sup>Centre for Structural Biology, Imperial College London, London SW7 2AZ, United  
16 Kingdom

17

18 \*Correspondence: [v.pelicic@imperial.ac.uk](mailto:v.pelicic@imperial.ac.uk)

19 **ABSTRACT**

20 Type IV filaments (Tff) - a superfamily of filamentous nanomachines virtually  
21 ubiquitous in prokaryotes - are helical assemblies of type IV pilins that mediate a  
22 wide variety of functions. The competence (Com) (pseudo)pilus is a widespread Tff  
23 mediating DNA uptake in bacteria with one membrane (monoderms), which is the  
24 first step in natural transformation, an important mechanism of horizontal gene  
25 transfer. Here, we report the genomic, phylogenetic and structural analysis of  
26 ComGC, the major pilin subunit of Com (pseudo)pili. By performing a global  
27 comparative analysis, we show that Com (pseudo)pili are virtually ubiquitous in  
28 Bacilli, a major monoderm class of Firmicutes, and ComGC displays extensive  
29 sequence conservation, defining a monophyletic group among type IV pilins. We also  
30 report two ComGC solution structures from two naturally competent human  
31 pathogens, *Streptococcus sanguinis* (ComGC<sub>SS</sub>) and *Streptococcus pneumoniae*  
32 (ComGC<sub>SP</sub>), revealing that this pilin displays extensive structural conservation.  
33 Strikingly, ComGC<sub>SS</sub> and ComGC<sub>SP</sub> exhibit a novel type IV pilin fold, which is purely  
34 helical. Modelling of ComGC packing into Tff confirms that its unusual structure is  
35 compatible with helical filament assembly. Owing to the widespread distribution of  
36 ComGC, these results have implications for hundreds of monoderm species.

37

38 **Keywords:** natural transformation, type IV pilin, type IV filaments, DNA uptake

## 39 INTRODUCTION

40 Filamentous nanomachines composed of type IV pilins are virtually ubiquitous in  
41 Bacteria and Archaea (Berry and Pelicic, 2015), to which they confer a variety of  
42 unrelated functions including adhesion, motility, protein secretion, DNA uptake.  
43 These type IV filaments (Tff) are assembled by conserved multi-protein machineries,  
44 which further underlines their phylogenetic relationship (Denise et al., 2019).

45 Much of our current understanding of this superfamily of nanomachines comes  
46 from the study of type IV pili (Tfp), the best characterised Tff (Berry and Pelicic,  
47 2015). In brief, Tfp are  $\mu\text{m}$ -long and thin surface-exposed filaments, which are  
48 polymers of usually one major type IV pilin. Type IV pilins (simply named pilins  
49 hereafter) are defined by an N-terminal sequence motif known as class III signal  
50 peptide (Giltner et al., 2012). This motif - IPR012902 entry in the InterPro database  
51 (Jones et al., 2014) - consists of a hydrophilic leader peptide ending with a tiny  
52 residue (Gly or Ala), followed by a tract of 21 mostly hydrophobic residues, except for  
53 a negatively charged Glu<sub>5</sub>. This hydrophobic tract represents the N-terminal portion  
54 ( $\alpha\text{1N}$ ) of an extended  $\alpha$ -helix of  $\sim 50$  residues ( $\alpha\text{1}$ ), which is the universally conserved  
55 structural feature of type IV pilins (Giltner et al., 2012). Although some small pilins  
56 consist solely of this extended  $\alpha$ -helix (Reardon and Mueller, 2013), most pilins have  
57 a globular head consisting of the C-terminal half of  $\alpha\text{1}$  ( $\alpha\text{1C}$ ) packed against a  $\beta$ -  
58 sheet composed of several antiparallel  $\beta$ -strands, which gives them their typical  
59 "lollipop" 3D architecture (Giltner et al., 2012). Upon translocation of prepilins across  
60 the cytoplasmic membrane (CM), where they remain embedded via their protruding  
61 hydrophobic  $\alpha\text{1N}$ , the leader peptide is processed by an integral membrane aspartic  
62 acid protease named prepilin peptidase (IPR000045) (LaPointe and Taylor, 2000).  
63 Processing primes pilins for polymerisation into filaments. Filament assembly, which  
64 remains poorly understood, is mediated by a multi-protein machinery in the CM,  
65 centred on an integral membrane platform protein (IPR003004) and a cytoplasmic  
66 extension ATPase (IPR007831) (Berry and Pelicic, 2015). As revealed by recent

67 cryo-EM structures of several Tfp (Kolappan et al., 2016; Wang et al., 2017),  
68 filaments are right-handed helical polymers where pilins are held together by  
69 extensive interactions between their  $\alpha 1$  helices, which are partially melted and run  
70 approximately parallel to each other within the filament core.

71 One of the key functional roles of Tff is their involvement in natural  
72 transformation in prokaryotes, the ability of species defined as "competent" to take up  
73 exogenous DNA across their membrane(s) and incorporate it stably into their  
74 genomes (Dubnau and Blokesch, 2019). This widespread property in bacteria  
75 (Johnston et al., 2014) is key for horizontal gene transfer, an important factor in  
76 bacterial evolution and the spread of antibiotic resistance. Tff are involved in the very  
77 first step of natural transformation, *i.e.* binding of free extracellular DNA and its  
78 translocation close to the cytoplasmic membrane (Dubnau and Blokesch, 2019).  
79 DNA is subsequently bound by the DNA receptor ComEA and further translocated  
80 across the CM through the ComEC channel (Dubnau and Blokesch, 2019). In diderm  
81 competent species, the Tff involved in DNA uptake is a sub-type of Tfp, known as  
82 Tfpa (Berry et al., 2019), which rapid depolymerisation is powered by the retraction  
83 ATPase PilT (IPR006321), generating exceptionally large tensile forces (Merz et al.,  
84 2000). In brief, Tfpa bind DNA directly, via one of their major or minor (low  
85 abundance) pilin subunits (Cehovin et al., 2013), and then are retracted by PilT,  
86 bringing DNA to the ComEA receptor (Ellison et al., 2018). In monoderm competent  
87 species, DNA uptake is mediated by a distinct Tff named competence (Com)  
88 (pseudo)pilus (Dubnau and Blokesch, 2019), much less well characterised than Tfp.  
89 Com (pseudo)pili are composed mainly of the major pilin (ComGC) (Chen et al.,  
90 2006; Laurenceau et al., 2013), and are assembled by a simple machinery  
91 composed of four minor pilins (ComGD, ComGE, ComGF, ComGG), a prepilin  
92 peptidase (ComC), an extension ATPase (ComGA) and a platform protein (ComGB)  
93 (Chung and Dubnau, 1995, 1998). Com filaments are elusive Tff, since  $\mu\text{m}$ -long  
94 filaments have been visualised only in *S. pneumoniae* so far (Laurenceau et al.,

95 2013; Muschiol et al., 2017), while filaments are thought to be much shorter in the  
96 other model competent species *Bacillus subtilis* (Chen et al., 2006). For this reason,  
97 until this points is addressed in other competent species, we refer to Com as  
98 (pseudo)pili in this study.

99         How Com (pseudo)pili are assembled, bind DNA and presumably retract in the  
100 absence of a PilT retraction motor is not understood. One important limitation is the  
101 absence of high-resolution structural information. Therefore, in the present study, we  
102 have focused on ComGC, the major subunit of the Com (pseudo)pilus. We report (i)  
103 a global comparative and phylogenetic analysis of ComGC, and (ii) 3D structures for  
104 two orthologs, ComGC<sub>SP</sub> from the model competent species *S. pneumoniae* and  
105 ComGC<sub>SS</sub> from *S. sanguinis*, a common cause of infective endocarditis in humans  
106 that has recently emerged as a monoderm model for the study of Tff. Finally, we  
107 discuss the general implications of these findings.

## 108 RESULTS

109

### 110 ***Com (pseudo)pili are almost ubiquitous in monoderm Bacilli, including the Tff*** 111 ***model S. sanguinis***

112 So far, Com (pseudo)pili have been mainly studied in two model competent species:  
113 *B. subtilis* and *S. pneumoniae*. *S. sanguinis* is a naturally competent species that has  
114 recently emerged as a monoderm Tff model since it expresses retractable Tfp<sub>a</sub> and  
115 Com (pseudo)pili (Pelicic, 2019). Functional analysis of *S. sanguinis* Tfp<sub>a</sub> showed  
116 that they are dispensable for DNA uptake, which is instead mediated by the Com  
117 (pseudo)pilus since competence was abolished in a  $\Delta comGB$  mutant (Gurung et al.,  
118 2016). A closer inspection of *S. sanguinis* genome revealed that all the genes  
119 encoding the Com (pseudo)pilus are present. These genes are organised in two loci  
120 (Fig. 1A), *comC* and the *comGABCDEDFG* operon, showing shared synteny with the  
121 corresponding loci in model competent species (Albano et al., 1989; Mohan et al.,  
122 1989). Multiple sequence alignments of the corresponding proteins with orthologs in  
123 *B. subtilis* and *S. pneumoniae* showed extensive conservation (Table S1). Detailed  
124 sequence analysis of the N-termini of the five ComG pilins identified clear class III  
125 signal peptides (Fig. 1B), *i.e.* with short (8-15 residues) and hydrophilic leader  
126 peptides ending with an Ala, followed by a tract of 21 mostly hydrophobic residues.  
127 ComGG is the only pilin that does not have a negatively charged Glu<sub>5</sub> and displays a  
128 non-canonical class III signal peptide (Fig. 1B), which is not identified by InterPro or  
129 PilFind that is dedicated to the prediction of type IV pilins (Imam et al., 2011). This is  
130 a conserved property for ComGG orthologs.

131 We next determined the global distribution of the Com system in publicly  
132 available complete bacterial genomes using MacSyFinder (Abby et al., 2014).  
133 Specifically, we used the MacSyFinder model built for the identification of Com  
134 systems (Denise et al., 2019), which takes into account the genetic composition and  
135 organisation of its components. This showed that the Com system is restricted to

136 Firmicutes, a phylum comprising a vast majority of monoderms, where it is  
137 exceptionally widespread since it was detected in 2,333 genomes (Supplemental  
138 Spreadsheet 1). An overwhelming majority of the corresponding species (99.7%)  
139 belong to the taxonomic class Bacilli (equally distributed among the Bacillales and  
140 Lactobacillales orders). As many as 88.7% of the sequenced Bacilli have a Com  
141 system. We also detected Com systems in one Clostridia (out of 336) and six  
142 Erysipelotrichia (out of 14). In total, 349 different species have the potential to  
143 express a Com (pseudo)pilus (Supplemental Spreadsheet 2).

144 Taken together, these findings suggest that the Com (pseudo)pilus is almost  
145 ubiquitous in Bacilli, and can be advantageously studied in the Tff model monoderm  
146 species *S. sanguinis*.

147

148 ***ComGC, the major subunit of Com (pseudo)pili, is highly conserved and***  
149 ***defines a monophyletic group among type IV pilins***

150 We next focused specifically on the major subunit of Com (pseudo)pili, the pilin  
151 ComGC (Chen et al., 2006; Laurenceau et al., 2013). Compared to major pilins from  
152 Tffa, ComGC is ~40% shorter, with 94 or 93 aa for the processed ComGC<sub>SS</sub> and  
153 ComGC<sub>SP</sub>, respectively (10.18 and 10.42 kDa). Moreover, unlike most other pilins, in  
154 which the only detectable sequence homology is usually in the  $\alpha$ 1N portion of the  
155 class III signal peptide (Giltner et al., 2012), ComGC orthologs show extensive  
156 sequence identity. For example, processed ComGC<sub>SS</sub> and ComGC<sub>SP</sub> display 65.6%  
157 overall sequence identity (Fig. 2). Similarly, processed ComGC<sub>SS</sub> and ComGC<sub>BS</sub>  
158 (from *B. subtilis*) show 33.3% sequence identity overall (Fig. S1). This is consistent  
159 with the existence of a ComGC signature in the InterPro database (IPR016940)  
160 (Jones et al., 2014), which lists 2,809 ComGC entries. Global multiple alignment of  
161 these ComGC proteins shows that most of the sequence is conserved in ~90% of the  
162 entries (Fig. 2). In Fig. 2, the consensus sequences have been aligned to ComGC<sub>SS</sub>  
163 and ComGC<sub>SP</sub>. Strikingly, some residues show sequence identity in virtually all the

164 entries, including residues outside of the  $\alpha$ 1N portion (such as Ala<sub>38</sub>, Gln<sub>46</sub>, Tyr<sub>50</sub> and  
165 Leu<sub>64</sub> in ComGC<sub>SS</sub>), which is highly unusual in type IV pilins.

166 The above observations suggest that Com (pseudo)pili form a highly  
167 homogeneous Tff sub-family. This was tested by performing a phylogenetic analysis  
168 based on the protein sequences of major pilins from different Tff found in a wide  
169 variety of bacteria, including Tfpa, Tfpb, Tfpc (also known as Tad pili), mannose-  
170 sensitive hemagglutinin pili (MSH), type II secretion systems (T2SS) and Com  
171 (pseudo)pili. The phylogeny tree that was generated (Fig. 3), using IQ-TREE  
172 (Nguyen et al., 2015), reveals that several Tff are in clear monophyletic groups with  
173 good branch support, >96% ultrafast bootstrap (UFBoot) (Hoang et al., 2018). Of  
174 particular interest, Com (pseudo)pili define a highly supported clade (99% UFBoot),  
175 clearly distinct from all other Tff systems.

176 Taken together, these findings show that ComGC is a small pilin with a highly  
177 conserved sequence, which defines a monophyletic group.

178

179 ***Solution structure of two ComGC orthologs reveal a conserved and new type***  
180 ***IV pilin fold***

181 Since high-resolution structural information is needed to improve our understanding  
182 of Com (pseudo)pili, we decided to solve the 3D structure of ComGC<sub>SS</sub>. To facilitate  
183 protein purification, we used a synthetic *comGC<sub>SS</sub>* gene codon-optimised for  
184 expression in *Escherichia coli*, and fused the 72 aa-long soluble portion of ComGC<sub>SS</sub>  
185 to a non-cleavable N-terminal hexahistidine tag (6His). This truncation, which  
186 removes the first 22 residues that invariably form a protruding hydrophobic  $\alpha$ -helix ( $\alpha$ -  
187 1N), is known not to affect the structural fold of the rest of the protein (Giltner et al.,  
188 2012). The resulting 8.79 kDa 6His-ComGC<sub>SS</sub> protein could be purified using a  
189 combination of affinity and gel-filtration chromatography, as a well-behaved and  
190 soluble protein. After purification of isotopically labelled protein with <sup>13</sup>C and <sup>15</sup>N for  
191 backbone and side-chain NMR resonance assignments, we could assign 99.5% of



192 the backbone and 92% of assignable protons overall. Structural ensembles were  
193 determined with 962 NOE based restraints, 50 hydrogen bonds, 110 dihedral angles  
194 restraints and 39 residual dipolar couplings (RDC) (Table 1). As can be seen in Fig.  
195 4, ComGC<sub>SS</sub> 3D structure is unlike that of any type IV pilin present in PDB, as it is  
196 purely helical, with three distinct helices connected by loops. The helices present are  
197 consistent with JPred secondary structure prediction (Fig. 2) (Drozdetskiy et al.,  
198 2015). The N-terminal  $\alpha$ 1-helix, which involves residues 37-53 of the processed  
199 protein, corresponds to  $\alpha$ 1C since the hydrophobic  $\alpha$ 1N has been truncated in 6His-  
200 ComGC<sub>SS</sub>. Tightly packed against this  $\alpha$ 1-helix, in a parallel plane, are  $\alpha$ 2-helix  
201 (residues 61-67) and  $\alpha$ 3-helix (residues 72-85), which stack against each other in  
202 antiparallel fashion (Fig. 4A) and orthogonally to  $\alpha$ 1. Except for the N-terminal  
203 unstructured residues, the ComGC<sub>SS</sub> structures within the NMR ensemble superpose  
204 well onto each other (Fig. 4B), with a root mean square deviation (RMSD) of 1.22 Å  
205 for C $\alpha$  atoms, which suggests that there is no significant flexibility in this region of the  
206 structure (Krissinel and Henrick, 2004). The unstructured N-terminus, which lacks  
207 long and medium NOEs present in the ordered regions of the proteins, was predicted  
208 to be highly dynamic based on TALOS+ (Shen et al., 2009), with an average S<sup>2</sup> order  
209 parameter of 0.49 ± 0.10.

210 Our ComGC<sub>SS</sub> structure differs markedly from the recently reported solution  
211 structure of ComGC<sub>SP</sub> (PDB 5NCA) (Muschiol et al., 2017), which is surprising  
212 considering the high sequence identity between these two proteins (Fig. 2).  
213 Therefore, in order to define the structural relationship between ComGC orthologs,  
214 we decided to solve the structure of ComGC<sub>SP</sub>. As above, we used a synthetic  
215 *comGC<sub>SP</sub>* gene codon-optimised for expression in *E. coli*, we fused the 71 aa-long  
216 soluble portion of ComGC<sub>SP</sub> to a non-cleavable N-terminal 6His tag and purified  
217 doubly labelled 6His-ComGC<sub>SP</sub> (8.99 kDa). Again, assignment was excellent since  
218 98.1% of the backbone and 90% of assignable protons overall could be assigned.  
219 Structural ensembles were determined with 880 NOE based restraints, 54 hydrogen

220 bonds, 102 dihedral angles restraints and 38 RDC (Table 1). As can be seen in Fig.  
221 5, our ComGC<sub>SP</sub> 3D structure is highly similar to the structure of ComGC<sub>SS</sub>, but very  
222 different from the solution structure that was recently determined from a low number  
223 of restraints (Fig. S2) (Muschiol et al., 2017). In brief, ComGC<sub>SP</sub> display three distinct  
224 helices, with  $\alpha$ 2-helix (residues 60-66) and  $\alpha$ 3-helix (residues 71-82) stacking against  
225 each other and packing orthogonal to the N-terminal  $\alpha$ 1-helix (Fig. 5A). As for  
226 ComGC<sub>SS</sub>, except for the unstructured N-terminus, there is no significant flexibility in  
227 ComGC<sub>SP</sub> since the structures within the NMR ensemble superpose well onto each  
228 other, with a RMSD of 1.60 Å for C $\alpha$  atoms (Fig. 5B). Our ComGC<sub>SS</sub> and ComGC<sub>SP</sub>  
229 averaged structures are highly similar (Fig. 5C), with 1.79 Å RMSD between their  
230 ordered regions and 1.54 Å RMSD for the helical regions, which is consistent with the  
231 high sequence identity between these two proteins.

232 As determined by GETAREA (Fraczkiewicz and Braun, 1998) with a probe  
233 radius of 1.4 Å, the average ratio of solvent exposure for the ordered portion of  
234 ComGC<sub>SS</sub> is 48.3%, relative to 6.7% for those residues determined to be on the  
235 interior. In our ComGC<sub>SS</sub> structure, conserved residues Val<sub>43</sub>, Gln<sub>46</sub>, Tyr<sub>50</sub>, Leu<sub>64</sub> and  
236 Ile<sub>70</sub> are deeply buried, with an average of only 6.0% solvent exposure, forming a  
237 critical portion of an hydrophobic core contributing to the globular fold of ComGC.  
238 (Fig. 6). In contrast, conserved Gly<sub>68</sub> is solvent exposed, which is important for the  
239 formation of the  $\alpha$ 2-helix-turn- $\alpha$ 3-helix motif where a tiny residue at the beginning of  
240 the turn is necessary to provide the flexibility and lack of steric restrictions required  
241 for turning. These observations also apply to our ComGC<sub>SP</sub> structure, and are  
242 surprisingly reflected in the conservation of multiple chemical shifts between the  
243 conserved residues in our two structures (Fig. S3). In addition, modelling of the  
244 globular head of ComGC<sub>BS</sub> (Fig. S4), which predicts a globular fold similar to  
245 ComGC<sub>SS</sub> and ComGC<sub>SP</sub>, shows that Cys<sub>36</sub> and Cys<sub>76</sub> are in close enough proximity  
246 to form a disulfide bond. Such disulfide bond, which is absent in ComGC<sub>SS</sub> and  
247 ComGC<sub>SP</sub> that do not have Cys residues, is expected to stabilise the globular fold

248 and was reported to stabilise ComGC in *B. subtilis* (Chen et al., 2006; Meima et al.,  
249 2002).

250 Since the hydrophobic  $\alpha 1N$  that has been truncated in 6His-ComGC<sub>SS</sub> is highly  
251 similar to the corresponding portion of the Pile major pilin from *Neisseria*  
252 *gonorrhoeae* (Fig. S5), we could model the structure of the portion of  $\alpha 1$  truncated in  
253 our construct, which produced a reliable model of full-length ComGC<sub>SS</sub> (Fig. 7).  
254 Comparison with the two different pilin folds identified so far - pilins from *N.*  
255 *gonorrhoeae* and *Geobacter sulfurreducens* have been chosen as representative  
256 models - clearly shows that ComGC adopts a radically different type IV pilin fold (Fig.  
257 7). All three pilins have in common an extended N-terminal  $\alpha 1$ -helix, the universal  
258 defining structural feature of type IV pilins (Giltner et al., 2012). In addition, while the  
259 very short *G. sulfurreducens* pilin almost exclusively consists of  $\alpha 1$ , both ComGC and  
260 Pile display a typical lollipop shape with a globular head mounted onto a "stick" (the  
261  $\alpha 1$ -helix). However, unlike in canonical pilins where the globular head consists of a 4-  
262 to 7-stranded antiparallel  $\beta$ -sheet in a parallel plane to  $\alpha 1$ , oriented 45° or more  
263 relative to the long axis of  $\alpha 1$  (Giltner et al., 2012), in ComGC the structural  
264 backbone of the globular head is an helix-turn-helix roughly orthogonal to  $\alpha 1$  (Fig. 7).  
265 While this fold falls within the class of mainly  $\alpha$  and the architecture of orthogonal  
266 bundles, it represents a novel fold.

267 Taken together, these structural findings show that ComGC orthologs display  
268 conserved 3D structures, with a previously unreported type IV pilin fold.

269

### 270 ***ComGC novel pilin fold is compatible with helical Tff assembly***

271 Since ComGC represents a novel type IV pilin structural fold, it was important to  
272 determine whether it could be modelled into recent cryo-EM structures obtained for a  
273 variety of bacterial Tff (Kolappan et al., 2016; Lopez-Castilla et al., 2017; Wang et al.,  
274 2017). These structures have revealed that a segment of  $\alpha 1$  is melted during filament

275 assembly, centred on helix-breaking residues Pro<sub>22</sub> and confirmed that the N-terminal  
276 Phe<sub>1</sub> is methylated. Since that portion  $\alpha$ 1 is highly conserved in ComGC, including  
277 the helix-breaking Pro<sub>22</sub> (Fig. S5), and ComGC has been shown to be N-terminally  
278 methylated in *S. pneumoniae* (Laurenceau et al., 2013), we used the PulG pilin from  
279 the cryo-EM structure of *Klebsiella oxytoca* T2SS pseudopili (Lopez-Castilla et al.,  
280 2017) to produce a reliable full-length 3D structural model of ComGC<sub>SS</sub> with a melted  
281 segment and an N-terminal methyl-Phe<sub>1</sub> (Fig. 8), using SWISS-MODEL (Waterhouse  
282 et al., 2018). Apart from these two modifications, this full-length ComGC<sub>SS</sub> model is  
283 very similar to the one in Fig. 7 for which a different template has been used.  
284 Considering that ComGC defines a monophyletic group and is highly conserved, it is  
285 very likely that all ComGC orthologs will display a similar 3D structure. This was  
286 strengthened by producing structural models for a range of different species  
287 expressing more or less distant ComGC (21.3-65.6% sequence identity), which were  
288 used to generate the phylogeny tree in Fig. 3. As seen in Fig. S6, all the models  
289 display the same lollipop shape with a globular head mounted onto a  $\alpha$ 1 stick. As for  
290 ComGC<sub>SS</sub> and ComGC<sub>SP</sub>, the structural backbone of the globular head is always a  
291 helix-turn-helix roughly orthogonal to  $\alpha$ 1.

292 We next assessed whether full-length ComGC would be compatible with helical  
293 Tff assembly, and found that to be the case. Despite its novel pilin fold, we were able  
294 to model packing of ComGC within the cryo-EM structure of *K. oxytoca* T2SS  
295 pseudopili, which have a morphology similar to Com (pseudo)pili observed in *S.*  
296 *pneumoniae* (Laurenceau et al., 2013; Muschiol et al., 2017). This produced a  
297 homology model with good Ramachandran plot statistics, i.e. allowed (95.3%),  
298 generously allowed (3.5%) and disallowed (1.1%) based on PROCHECK (Laskowski  
299 et al., 1993). As can be seen in Fig. 8, the model revealed a right-handed helical  
300 packing of the conserved N-terminal  $\alpha$ 1-helices of ComGC<sub>SS</sub> in the filament core,  
301 which run approximately parallel to each other and establish extensive hydrophobic  
302 interactions. In addition, the Glu<sub>5</sub> side chain of subunit S establishes a salt bridge and

303 a hydrogen bond with Phe<sub>1</sub> and Thr<sub>2</sub>, respectively, of S+1. Importantly, the globular  
304 heads are stacked on top of each other along the long axis of the filaments and their  
305 helix-turn-helix structural backbone forms the outer surface of the filaments (Fig. 8).

## 306 **DISCUSSION**

307 Their virtual ubiquity in prokaryotes and role in a variety of key biological processes  
308 make Tff an important research topic (Berry and Pelicic, 2015; Denise et al., 2019).  
309 Com (pseudo)pili are involved in DNA uptake in naturally competent monoderm  
310 bacteria (Dubnau and Blokesch, 2019). Imported DNA, which usually leads to  
311 genome diversification via transformation, can also be used as a source of food or as  
312 a template for repair of damaged genomic DNA (Johnston et al., 2014). Compared to  
313 Tff in diderms, most notably Tfp and T2SS that have been extensively studied, Com  
314 (pseudo)pili have been understudied, including from a structural point of view. In this  
315 report, we focused on the major subunit of Com (pseudo)pili, the ComGC pilin, which  
316 we analysed genomically, phylogenetically and structurally. This led to the notable  
317 findings discussed below.

318         Although Com (pseudo)pili have been primarily studied in two model competent  
319 species (*B. subtilis* and *S. pneumoniae*), the present study makes it clear that they  
320 are widespread since complete sets of Com-encoding genes are readily detected in  
321 more than 2,300 genomes corresponding to almost 350 different species. However,  
322 unlike promiscuous Tff such as Tfp and T2SS that are found in virtually all phyla of  
323 Bacteria (Denise et al., 2019), Com (pseudo)pili are restricted to a single phylum  
324 (Firmicutes) and almost exclusively to a single underlying class of monoderms  
325 (Bacilli), where they are almost ubiquitous. Indeed, an overwhelming majority of  
326 Bacilli genomes (88%) have Com-encoding genes. Interestingly, the major subunit of  
327 Com (pseudo)pili (ComGC) shows extensive sequence conservation in the  
328 corresponding genomes and define a clear monophyletic group within type IV pilins.  
329 Taken together, these observations suggest that the Com (pseudo)pilus is a Tff that  
330 has emerged only once, very early during the diversification of Firmicutes, where it  
331 has remained largely confined ever since. Since the Com-encoding genes have not  
332 become pseudogenes, it is likely that most Bacilli have the ability to assemble a Com  
333 (pseudo)pilus and take up DNA. However, since only a handful of these species have

334 been experimentally shown to be competent (Johnston et al., 2014), this implies that  
335 either the imported DNA is primarily used as food or for genome repair instead of  
336 genome diversification, or that the inducing cues leading to transformation are yet to  
337 be established for most species of Firmicutes. Alternatively, Com (pseudo)pili might  
338 have evolved in some of these species to take up other macromolecules, which is  
339 however at odds with the conservation of the five pilins.

340 Perhaps the most important finding in this study is that ComGC, the major  
341 subunit of the Com (pseudo)pilus, displays an entirely novel major pilin fold where  
342 the extended N-terminal  $\alpha$ 1-helix, the universal defining structural feature of type IV  
343 pilins (Giltner et al., 2012), is topped by a purely helical globular head. ComGC thus  
344 appears to be a "middle ground" between longer canonical pilins (e.g. *N.*  
345 *gonorrhoeae*), in which the globular head consists of an antiparallel  $\beta$ -sheet, and the  
346 very short pilins where a globular head is missing altogether (e.g. *G. sulfurreducens*).  
347 These structures point to a hypothetical evolutionary scenario during which truncation  
348 of the antiparallel  $\beta$ -sheet in a canonical type IV pilin might have led to a purely  
349 helical ComGC proto-structure. Intriguingly, this scenario "works" particularly well  
350 with Pile1, the major subunit of *S. sanguinis* Tfp, which has two short  $\alpha$ -helices in the  
351 loop connecting  $\alpha$ 1 and the antiparallel  $\beta$ -sheet (Berry et al., 2019). Importantly, this  
352 putative "truncation" does not interfere with the ability of ComGC to be assembled  
353 into helical filaments, since ComGC could be readily modelled into recent Tff  
354 structures (Kolappan et al., 2016; Lopez-Castilla et al., 2017; Wang et al., 2017).  
355 Com (pseudo)pili are thus likely to result from the right-handed helical packing of  
356 ComGC  $\alpha$ 1-helices within the filament core, running parallel to each other and  
357 establishing extensive hydrophobic interactions, with a melted central portion. Such  
358 packing will stack the globular heads on top of each other, forming the surface of the  
359 filaments. Extensive sequence conservation, including for residues which make  
360 contacts between chains in our (pseudo)pilus model beyond the classically  
361 conserved  $\alpha$ 1N, and the fact that the two structures that we solved are virtually

362 identical, strongly suggest that these structural features apply to the whole ComGC  
363 clade, including species such as *B. subtilis* where extended filaments have not been  
364 observed (Chen et al., 2006). It is therefore surprising that a recently published NMR  
365 structure of ComGC<sub>SP</sub> (PDB 5NCA) (Muschiol et al., 2017) differs dramatically from  
366 ours. While the previous structure is purely helical as well, the orientation of the  $\alpha 2$   
367 and  $\alpha 3$  helices is entirely different, resulting in an absence of packing of the  
368 conserved hydrophobic core. Therefore, PDB 5NCA which resembles a one-sided  
369 "pick-axe" with no globular head cannot be readily modelled into a helical Tff (Fig.  
370 S7). Indeed, the pick-axe points towards the filament core, which is sterically  
371 disallowed and incompatible with filament assembly. Interestingly, our assignments  
372 vary only slightly from those previously produced for PDB 5NCA (Fig. S8). However,  
373 while we have managed to successfully assign 90% assignable protons overall, the  
374 previous assignment was merely 65% (Muschiol et al., 2017), which probably  
375 accounts for the apparently "unfolded" state of PDB 5NCA. Indeed, without a high  
376 degree of proton identification, the assignment of NOESY peaks and production of  
377 distance restraints fails. Local hydrogen bonds and dihedral restraints often cannot  
378 compensate for lack of long-range NOEs within the protein interior or between  
379 elements of secondary structure.

380 Together with these conserved structural features, the conservation *en bloc* of  
381 the genes encoding the Com (pseudo)pilus strongly suggests that the molecular  
382 mechanisms of filament assembly and DNA uptake are widely conserved in  
383 Firmicutes. These mechanisms, which remain poorly understood, can be  
384 advantageously studied in *S. sanguinis*, which has recently emerged as a monoderm  
385 Tfp model (Pelicic, 2019). Actually, *S. sanguinis* is the only monoderm shown to  
386 express two distinct Tff, retractable Tfpa and Com (pseudo)pili, which further  
387 cements it as a prime Tff model species. Comparison with other Tff systems shows  
388 that the machinery involved in biogenesis of Com (pseudo)pili is one of the simplest,  
389 by far. Since ComGD, ComGE, ComGF and ComGG pilins are likely to be minor



390 (pseudo)pilus components important for filament stability and function (a conserved  
391 role for minor pilins in various Tff) (Berry and Pelicic, 2015), and ComC is the prepilin  
392 peptidase processing pilins (Chung et al., 1998), it appears that assembly of ComGC  
393 into filaments is mediated by two proteins only. Namely, an extension ATPase  
394 (ComGA) and a platform protein (ComGB), which together will assemble processed  
395 ComGC in a right-handed helical filament. Upon DNA binding, which has been  
396 visualised for *S. pneumoniae* Com (pseudo)pili, but the receptor is yet to be identified  
397 (Laurenceau et al., 2013), uptake will be initiated by filament retraction (Ellison et al.,  
398 2018). Since there is no dedicated retraction ATPase, ComGA might therefore be a  
399 bifunctional motor powering both extension and retraction like recently suggested for  
400 the Tfpc motor (Ellison et al., 2019). It would be interesting to image Com filaments  
401 dynamics and DNA-binding ability in live cells, using a labelling strategy that has  
402 recently enabled the visualisation of these steps for Tfpa involved in competence in  
403 naturally competent diderm species (Ellison et al., 2018).

404 In conclusion, by providing high-resolution structural information for the  
405 ComGC pilins, this study has shed light on an understudied Tff involved in DNA  
406 uptake found in hundreds of monoderm bacterial species and has led to the  
407 surprising discovery of a novel type IV pilin fold. This paves the way for further  
408 investigations of this minimalist Tff, which are expected to improve our understanding  
409 of a fascinating superfamily of filamentous nanomachines ubiquitous in prokaryotes.

## 410 **EXPERIMENTAL PROCEDURES**

411

### 412 **Bioinformatic analyses**

413 Protein sequences were routinely analysed using the DNA Strider program. Protein  
414 sequence alignments were done using the Clustal Omega server at EMBL-EBI.  
415 Pretty-printing of alignment files was done using BoxShade server at ExPASy.  
416 Reformatting of large multiple alignment files was done using the MView server at  
417 EMBL-EBI. Prediction of functional domains was done using the InterProScan server  
418 at EMBL-EBI, which was also used to download all the ComGC protein entries with  
419 an IPR0160940 domain. Protein secondary structure prediction was done using  
420 JPred server at University of Dundee. Protein 3D structures were downloaded from  
421 the RCSB PDB server. Molecular visualisation of protein 3D structures was done  
422 using PyMOL (Schrödinger). The GETAREA server, at UTMB, was used for  
423 calculating the solvent accessible surface area of ComGC proteins.

424         Detection of the Com systems in genomes available in NCBI RefSeq database  
425 (last accessed in April 2019, 13,512 genomes of Bacteria and Archaea) was done as  
426 described previously (Denise et al., 2019), using MacSyFinder (Abby et al., 2014)  
427 and the relevant HMM Com model (Denise et al., 2019). Phylogenetic analysis based  
428 on protein sequences of major pilins of different Tff involved an initial alignment of the  
429 sequences using MAFFT v7.273 (Katoh and Standley, 2013), specifically the linsi  
430 algorithm. Multiple alignments were analysed using Noisy v1.5.12 (Dress et al., 2008)  
431 with default parameters, in order to select the informative sites. Next, we inferred  
432 maximum likelihood trees from the curated alignments using IQ-TREE v 1.6.7.2  
433 (Nguyen et al., 2015), with option -allnni. We evaluated the node supports using the  
434 options -bb 1,000 for ultra-fast bootstraps, and -alrt 1,000 for SH-aLRT (Hoang et al.,  
435 2018). The best evolutionary model was selected with ModelFinder  
436 (Kalyaanamoorthy et al., 2017), option -MF and BIC criterion. We used the option -  
437 wbtI to conserve all optimal trees and their branches length.

438

### 439 **Protein expression and purification**

440 A synthetic gene, codon-optimised for *E. coli* expression, encoding ComGC<sub>SS</sub> from *S.*  
441 *sanguinis* 2908 (Gurung et al., 2016) was synthesised and cloned by GeneArt,  
442 yielding pMA-T-comGC<sub>SS</sub> (Table S2). The portion of the gene encoding residues 23-  
443 94 from the mature protein was PCR-amplified using comGC<sub>SS</sub>-F and comGC<sub>SS</sub>-R  
444 primers (Table S3), cut with NcoI and BamHI and cloned into the pET28b vector  
445 (Novagen) cut with the same enzymes. The forward primer was designed to fuse a  
446 non-cleavable N-terminal 6His tag to ComGC<sub>SS</sub>. The resulting plasmid was verified  
447 by sequencing and transformed into chemically competent *E. coli* BL21(DE3) cells. A  
448 single colony was transferred to 10 ml of LB supplemented with 50 µg.ml<sup>-1</sup>  
449 kanamycin and grown at 37°C overnight (O/N). This pre-culture was back-diluted  
450 100-fold into 1 l M9 minimal medium, supplemented with antibiotic, a mixture of  
451 vitamins and trace elements, and <sup>13</sup>C D-glucose and <sup>15</sup>N NH<sub>4</sub>Cl for isotopic labelling.  
452 Cells were grown in an orbital shaker at 37°C until the OD<sub>600</sub> reached 0.7, before  
453 adding 0.4 mM IPTG (Merck Chemicals) to induce protein expression during 16 h at  
454 18°C. Cells were then harvested by centrifugation at 8,000 g for 20 min and  
455 subjected to one freeze/thaw cycle in lysis buffer (PBS pH 7.4, with EDTA-free  
456 protease inhibitors). This lysate was further disrupted by repeated cycles of  
457 sonication, pulses of 5 sec on and 5 sec off during 5 min, until the cell suspension  
458 was visibly less viscous. The cell lysate was then centrifuged for 20 min at 18,000 g  
459 to remove cell debris. The clarified lysate was then passed using an ÄKTA Purifier  
460 FPLC through a 1 ml HisTrap HP column (GE Healthcare), pre-equilibrated in lysis  
461 buffer. The column was then washed extensively with lysis buffer to remove unbound  
462 material before 6His-ComGC<sub>SS</sub> was eluted using elution buffer (PBS pH 7.4, 200 mM  
463 NaCl, 300 mM imidazole). Affinity-purified ComGC<sub>SS</sub> was further purified by gel-  
464 filtration chromatography on an HiLoad 16/600 Superdex 75 column (GE

465 Healthcare), using (25 mM Na<sub>2</sub>HPO<sub>4</sub>/NaH<sub>2</sub>PO<sub>4</sub> pH 6, 200 mM NaCl) buffer for  
466 elution. For RDC measurements we produced <sup>15</sup>N labelled protein as follows.  
467 Bacteria grown O/N in 5 ml LB with antibiotic were sub-cultured at 37°C in 0.8 l LB to  
468 0.6 OD<sub>600</sub>, and then transferred to 0.4 l M9 with <sup>15</sup>N NH<sub>4</sub>Cl, unlabelled D-glucose, and  
469 10 µg.l<sup>-1</sup> thiamine. Cultures were induced with 0.3 mM IPTG at 16°C for 18 h. After  
470 the production of a clarified lysate, protein was purified as above, except for the use  
471 of hand-made Ni-NTA agarose (Qiagen) in (50 mM Tris pH 8, 300 mM NaCl) and  
472 eluted using (50 mM Tris pH 8, 200 mM NaCl, 300 mM imidazole), and Superdex 75  
473 10/300 GL (GE Healthcare) columns in (25 mM Tris pH 8, 200 mM NaCl) and  
474 dialysed into (25 mM Na<sub>2</sub>HPO<sub>4</sub>/NaH<sub>2</sub>PO<sub>4</sub> pH 6, 50 mM NaCl).

475 For ComGC<sub>SP</sub>, a codon-optimised synthetic gene based on the gene from *S.*  
476 *pneumoniae* R6 was synthesised and cloned by GeneArt, yielding pMA-T-comGC<sub>SP</sub>  
477 (Table S2). The portion of the gene encoding residues 23-93 from the mature protein  
478 was PCR-amplified using comGC<sub>SP</sub>-F and comGC<sub>SP</sub>-R primers (Table S3), cut with  
479 NcoI and BamHI and cloned into the pET28b vector (Novagen) cut with the same  
480 enzymes. The forward primer was designed to fuse a non-cleavable N-terminal 6His  
481 tag to ComGC<sub>SS</sub>. The resulting plasmid was verified by sequencing and transformed  
482 into chemically competent *E. coli* BL21(DE3) cells. A single colony was transferred to  
483 5 ml of LB supplemented with 50 µg.ml<sup>-1</sup> kanamycin and grown O/N at 37°C. Bacteria  
484 were sub-cultured at 37°C in 0.8 l LB with antibiotic to OD<sub>600</sub> 0.7, and then transferred  
485 into 0.4 l M9 with 10 µg.l<sup>-1</sup> thiamine, and either <sup>15</sup>N NH<sub>4</sub>Cl and unlabelled D-glucose,  
486 or <sup>15</sup>N NH<sub>4</sub>Cl and <sup>13</sup>C D-glucose. Cultures were induced with 0.3 mM IPTG at 16°C  
487 for 18 h. After the production of a clarified lysate, ComGC<sub>SS</sub> was purified as above  
488 using hand-made Ni-NTA agarose (Qiagen) and Superdex 75 10/300 GL (GE  
489 Healthcare) columns.

490

#### 491 **NMR spectroscopy and structure determination**

492 All data was collected on Bruker Avance III HD 800 MHz and 600 MHz triple  
493 resonance spectrometers with cryoprobes operated at 25°C. For ComGC<sub>SS</sub>, a  
494 sample containing <sup>13</sup>C, <sup>15</sup>N labelled protein at 1 mM in NMR buffer (25 mM  
495 Na<sub>2</sub>HPO<sub>4</sub>/NaH<sub>2</sub>PO<sub>4</sub> pH 6, 50 mM NaCl, 5% D<sub>2</sub>O) was used for assignment  
496 experiments and structure determination. For ComGC<sub>SP</sub>, a sample containing <sup>13</sup>C,  
497 <sup>15</sup>N labelled protein at 1.8 mM in NMR buffer was used for assignment experiments  
498 and structure determination. Resonance assignments for ComGC<sub>SS</sub> were performed  
499 using <sup>15</sup>N HSQC, <sup>13</sup>C aliphatic HSQC, HNCACB, CBCACONH, HBHA, HNCO,  
500 HNCACO, HCCCONH, CCONH and CCH. For ComGC<sub>SP</sub>, assignments were  
501 performed using <sup>15</sup>N HSQC, <sup>13</sup>C aliphatic HSQC, HNCA, CBCANH, CBCACONH,  
502 HBHA, HNCO, HNCACO, HCCCONH, CCONH and CCH. All data was processed  
503 using MddNMR (Orekhov and Jaravine, 2011) for reconstruction after Non-Uniform  
504 Sampling and NMRPipe (Delaglio et al., 1995). Peak picking and assignments were  
505 performed in SPARKY (Lee et al., 2015).

506 NOE peak lists were used, with mixing time of 140 msec, from 3D <sup>13</sup>C HSQC-  
507 NOESY, 3D <sup>15</sup>N HSQC-NOESY for ComGC<sub>SP</sub>, and simultaneous <sup>13</sup>C/<sup>15</sup>N chemical  
508 shift evolution NOESY for ComGC<sub>SS</sub>. For both proteins, RDC lists were derived from  
509 <sup>15</sup>N HSQC-IPAP experiments on <sup>15</sup>N labelled isotropic and aligned sample in 3%  
510 PEG/hexanol liquid crystal, with D<sub>2</sub>O splitting of ~7 Hz. RDCs were included in the  
511 structure calculations if there was baseline resolution and for residues where  
512 TALOS+ predicted order parameter of >0.8. Angular constraints from TALOS+ were  
513 used in the structure calculations. Both ComGC<sub>SS</sub> and ComGC<sub>SP</sub> structures were  
514 determined using Ponderosa-C/S (Lee et al., 2015), refined using Xplor-NIH 2.52  
515 (Schwieters et al., 2006), aligned using Theseus (Theobald and Wuttke, 2008), and  
516 secondary structure checked using Stride (Frishman and Argos, 1995). Structure  
517 validation was performed using PSVS (Bhattacharya et al., 2007), PROCHECK  
518 (Laskowski et al., 1993) and in-house scripts.

519

520 **Modelling**

521 SWISS-MODEL server at ExPASy was used for modelling protein 3D structures. In  
522 brief, the full-length ComGC<sub>SS</sub> was modelled with using *N. gonorrhoeae* major pilin  
523 (PDB 2PIL) as a template (Forest et al., 1999). We first modelled the missing  $\alpha$ 1  
524 residues in our structure, which was aligned to our Xplor-NIH-produced average  
525 NMR structure (without the first unstructured  $\alpha$ 1 residues) using PyMol and finally  
526 merged using Coot (Emsley et al., 2010).

527 Similarly, the full-length ComGC<sub>SS</sub> structure within filaments was modelled by  
528 using one *K. oxytoca* PulG subunit from the T2SS pseudopilus (PDB 5WDA) as a  
529 template for the missing  $\alpha$ 1 residues in our structure (Lopez-Castilla et al., 2017).  
530 This full-length ComGC<sub>SS</sub> was then used to produce models of a variety of more or  
531 less distant ComGC orthologs. The Com (pseudo)pilus model was produced after  
532 alignment of the averaged NMR structure ComGC  $\alpha$ 1-helices to the  $\alpha$ 1-helices of  
533 SWISS-MODEL PulG-based homology model subunits in the T2SS pseudopilus.  
534 This was also done for the recently published ComGC<sub>SP</sub> structure (PDB 5NCA). The  
535 structures were fused and we added the N-terminal methyl-Phe<sub>1</sub> using Coot (Emsley  
536 et al., 2010). In addition, we modelled packing of full-length ComGC<sub>SS</sub> in the PAK  
537 pilus from *P. aeruginosa* (PDB 5VXY) (Wang et al., 2017).

538 **ACCESSION NUMBERS**

539 The NMR solution structures of ComGC<sub>SS</sub> and ComGC<sub>SP</sub> have been deposited in the  
540 Protein Data Bank under entries 6TXT and 6Y1H, respectively. Chemical shift  
541 assignments and NOE-based restraints used in structure calculations are available  
542 from the BMRB under accession numbers 50194 and 7441, respectively.

543 **AUTHOR CONTRIBUTIONS**

544 V.P. designed the research. E.P.C.R., S.J.M. and V.P. directed the research.

545 Experiments were done by D.S., J.L.B and R.D. All authors contributed to writing the

546 manuscript.



547 **ACKNOWLEDGMENTS**

548 This work was funded by a Medical Research Council grant (MR/P022197/1) to V.P.  
549 R.D. was funded by the doctoral school Complexité du vivant-ED515 (contract  
550 number 2449/2016). E.P.C.R. was funded by the INCEPTION project (PIA/ANR-16-  
551 CONV-0005). This work relied heavily on the use of the Cross-Faculty NMR Centre  
552 at Imperial College London. We are grateful to Nicolas Biais (City University of New  
553 York) and Romé Voulhoux (CNRS Marseille) for critical reading of the manuscript.

554 **REFERENCES**

- 555 Abby, S.S., Neron, B., Menager, H., Touchon, M., and Rocha, E.P. (2014).  
556 MacSyFinder: a program to mine genomes for molecular systems with an application  
557 to CRISPR-Cas systems. *PLoS One* 9, e110726.
- 558 Albano, M., Breitling, R., and Dubnau, D.A. (1989). Nucleotide sequence and genetic  
559 organization of the *Bacillus subtilis comG* operon. *J Bacteriol* 171, 5386-5404.
- 560 Berry, J.L., Gurung, I., Anonsen, J.H., Spielman, I., Harper, E., Hall, A.M.J.,  
561 Goosens, V.J., Raynaud, C., Koomey, M., Biais, N., *et al.* (2019). Global biochemical  
562 and structural analysis of the type IV pilus from the Gram-positive bacterium  
563 *Streptococcus sanguinis*. *J Biol Chem* 294, 6796-6808.
- 564 Berry, J.L., and Pelicic, V. (2015). Exceptionally widespread nano-machines  
565 composed of type IV pilins: the prokaryotic Swiss Army knives. *FEMS Microbiol Rev*  
566 39, 134-154.
- 567 Bhattacharya, A., Tejero, R., and Montelione, G.T. (2007). Evaluating protein  
568 structures determined by structural genomics consortia. *Proteins* 66, 778-795.
- 569 Cehovin, A., Simpson, P.J., McDowell, M.A., Brown, D.R., Noschese, R., Pallett, M.,  
570 Brady, J., Baldwin, G.S., Lea, S.M., Matthews, S.J., *et al.* (2013). Specific DNA  
571 recognition mediated by a type IV pilin. *Proc Natl Acad Sci USA* 110, 3065-3070.
- 572 Chen, I., Provvedi, R., and Dubnau, D. (2006). A macromolecular complex formed by  
573 a pilin-like protein in competent *Bacillus subtilis*. *J Biol Chem* 281, 21720-21727.
- 574 Chung, Y.S., Breidt, F., and Dubnau, D. (1998). Cell surface localization and  
575 processing of the ComG proteins, required for DNA binding during transformation of  
576 *Bacillus subtilis*. *Mol Microbiol* 29, 905-913.
- 577 Chung, Y.S., and Dubnau, D. (1995). ComC is required for the processing and  
578 translocation of ComGC, a pilin-like competence protein of *Bacillus subtilis*. *Mol*  
579 *Microbiol* 15, 543-551.

580 Chung, Y.S., and Dubnau, D. (1998). All seven *comG* open reading frames are  
581 required for DNA binding during transformation of competent *Bacillus subtilis*. *J*  
582 *Bacteriol* *180*, 41-45.

583 Delaglio, F., Grzesiek, S., Vuister, G.W., Zhu, G., Pfeifer, J., and Bax, A. (1995).  
584 NMRPipe: a multidimensional spectral processing system based on UNIX pipes. *J*  
585 *Biomol NMR* *6*, 277-293.

586 Denise, R., Abby, S.S., and Rocha, E.P.C. (2019). Diversification of the type IV  
587 filament superfamily into machines for adhesion, protein secretion, DNA uptake, and  
588 motility. *PLoS Biol* *17*, e3000390.

589 Dress, A.W., Flamm, C., Fritsch, G., Grunewald, S., Kruspe, M., Prohaska, S.J., and  
590 Stadler, P.F. (2008). Noisy: identification of problematic columns in multiple  
591 sequence alignments. *Algorithm Mol Biol* *3*, 7.

592 Drozdetskiy, A., Cole, C., Procter, J., and Barton, G.J. (2015). JPred4: a protein  
593 secondary structure prediction server. *Nucleic Acids Res* *43*, W389-W394.

594 Dubnau, D., and Blokesch, M. (2019). Mechanisms of DNA uptake by naturally  
595 competent bacteria. *Annu Rev Genet* *53*, 217-237.

596 Ellison, C.K., Dalia, T.N., Vidal Ceballos, A., Wang, J.C., Biais, N., Brun, Y.V., and  
597 Dalia, A.B. (2018). Retraction of DNA-bound type IV competence pili initiates DNA  
598 uptake during natural transformation in *Vibrio cholerae*. *Nat Microbiol* *3*, 773-780.

599 Ellison, C.K., Kan, J., Chlebek, J.L., Hummels, K.R., Panis, G., Viollier, P.H., Biais,  
600 N., Dalia, A.B., and Brun, Y.V. (2019). A bifunctional ATPase drives tad pilus  
601 extension and retraction. *Sci Adv* *5*, eaay2591.

602 Emsley, P., Lohkamp, B., Scott, W.G., and Cowtan, K. (2010). Features and  
603 development of Coot. *Acta Crystallogr Sect D: Biol Crystallogr* *66*, 486-501.

604 Forest, K.T., Dunham, S.A., Koomey, M., and Tainer, J.A. (1999). Crystallographic  
605 structure reveals phosphorylated pilin from *Neisseria*: phosphoserine sites modify  
606 type IV pilus surface chemistry and fibre morphology. *Mol Microbiol* *31*, 743-752.

607 Fraczekiewicz, R., and Braun, W. (1998). Exact and efficient analytical calculation of  
608 the accessible surface areas and their gradients for macromolecules. *J Comput*  
609 *Chem* *19*, 319-333.

610 Frishman, D., and Argos, P. (1995). Knowledge-based protein secondary structure  
611 assignment. *Proteins* *23*, 566-579.

612 Giltner, C.L., Nguyen, Y., and Burrows, L.L. (2012). Type IV pilin proteins: versatile  
613 molecular modules. *Microbiol Mol Biol Rev* *76*, 740-772.

614 Gurung, I., Spielman, I., Davies, M.R., Lala, R., Gaustad, P., Biais, N., and Pelicic, V.  
615 (2016). Functional analysis of an unusual type IV pilus in the Gram-positive  
616 *Streptococcus sanguinis*. *Mol Microbiol* *99*, 380-392.

617 Hoang, D.T., Chernomor, O., von Haeseler, A., Minh, B.Q., and Vinh, L.S. (2018).  
618 UFBoot2: improving the ultrafast bootstrap approximation. *Mol Biol Evol* *35*, 518-522.

619 Imam, S., Chen, Z., Roos, D.S., and Pohlschröder, M. (2011). Identification of  
620 surprisingly diverse type IV pili, across a broad range of Gram-positive bacteria.  
621 *PLoS One* *6*, e28919.

622 Johnston, C., Martin, B., Fichant, G., Polard, P., and Claverys, J.P. (2014). Bacterial  
623 transformation: distribution, shared mechanisms and divergent control. *Nat Rev*  
624 *Microbiol* *12*, 181-196.

625 Jones, P., Binns, D., Chang, H.Y., Fraser, M., Li, W., McAnulla, C., McWilliam, H.,  
626 Maslen, J., Mitchell, A., Nuka, G., *et al.* (2014). InterProScan 5: genome-scale  
627 protein function classification. *Bioinformatics* *30*, 1236-1240.

628 Kalyaanamoorthy, S., Minh, B.Q., Wong, T.K.F., von Haeseler, A., and Jermini, L.S.  
629 (2017). ModelFinder: fast model selection for accurate phylogenetic estimates. *Nat*  
630 *Methods* *14*, 587-589.

631 Katoh, K., and Standley, D.M. (2013). MAFFT multiple sequence alignment software  
632 version 7: improvements in performance and usability. *Mol Biol Evol* *30*, 772-780.

633 Kolappan, S., Coureuil, M., Yu, X., Nassif, X., Egelman, E.H., and Craig, L. (2016).  
634 Structure of the *Neisseria meningitidis* type IV pilus. *Nat Commun* *7*, 13015.

635 Krissinel, E., and Henrick, K. (2004). Secondary-structure matching (SSM), a new  
636 tool for fast protein structure alignment in three dimensions. *Acta Crystallogr Sect D:*  
637 *Biol Crystallogr* 60, 2256-2268.

638 LaPointe, C.F., and Taylor, R.K. (2000). The type 4 prepilin peptidases comprise a  
639 novel family of aspartic acid proteases. *J Biol Chem* 275, 1502-1510.

640 Laskowski, R.A., W., M.M., Moss, D.S., and Thornton, J.M. (1993). PROCHECK - a  
641 program to check the stereochemical quality of protein structures. *J Appl Crystallogr*  
642 26, 283-291.

643 Laurenceau, R., Pehau-Arnaudet, G., Baconnais, S., Gault, J., Malosse, C.,  
644 Dujeancourt, A., Campo, N., Chamot-Rooke, J., Le Cam, E., Claverys, J.P., *et al.*  
645 (2013). A type IV pilus mediates DNA binding during natural transformation in  
646 *Streptococcus pneumoniae*. *PLoS Pathog* 9, e1003473.

647 Lee, W., Tonelli, M., and Markley, J.L. (2015). NMRFAM-SPARKY: enhanced  
648 software for biomolecular NMR spectroscopy. *Bioinformatics* 31, 1325-1327.

649 Lopez-Castilla, A., Thomassin, J.L., Bardiaux, B., Zheng, W., Nivaskumar, M., Yu, X.,  
650 Nilges, M., Egelman, E.H., Izadi-Pruneyre, N., and Francetic, O. (2017). Structure of  
651 the calcium-dependent type 2 secretion pseudopilus. *Nat Microbiol* 2, 1686-1695.

652 Meima, R., Eschevins, C., Fillinger, S., Bolhuis, A., Hamoen, L.W., Dorenbos, R.,  
653 Quax, W.J., van Dijl, J.M., Provvedi, R., Chen, I., *et al.* (2002). The *bdbDC* operon of  
654 *Bacillus subtilis* encodes thiol-disulfide oxidoreductases required for competence  
655 development. *J Biol Chem* 277, 6994-7001.

656 Merz, A.J., So, M., and Sheetz, M.P. (2000). Pilus retraction powers bacterial  
657 twitching motility. *Nature* 407, 98-102.

658 Mohan, S., Aghion, J., Guillen, N., and Dubnau, D. (1989). Molecular cloning and  
659 characterization of *comC*, a late competence gene of *Bacillus subtilis*. *J Bacteriol*  
660 171, 6043-6051.

661 Muschiol, S., Erlendsson, S., Aschtgen, M.S., Oliveira, V., Schmieder, P., de  
662 Lichtenberg, C., Teilum, K., Boesen, T., Akbey, U., and Henriques-Normark, B.

663 (2017). Structure of the competence pilus major pilin ComGC in *Streptococcus*  
664 *pneumoniae*. J Biol Chem 292, 14134-14146.

665 Nguyen, L.T., Schmidt, H.A., von Haeseler, A., and Minh, B.Q. (2015). IQ-TREE: a  
666 fast and effective stochastic algorithm for estimating maximum-likelihood  
667 phylogenies. Mol Biol Evol 32, 268-274.

668 Orekhov, V.Y., and Jaravine, V.A. (2011). Analysis of non-uniformly sampled spectra  
669 with multi-dimensional decomposition. Prog Nucl Mag Res Spect 59, 271-292.

670 Pelicic, V. (2019). Monoderm bacteria: the new frontier for type IV pilus biology. Mol  
671 Microbiol 112, 1674-1683.

672 Reardon, P.N., and Mueller, K.T. (2013). Structure of the type IVa major pilin from  
673 the electrically conductive bacterial nanowires of *Geobacter sulfurreducens*. J Biol  
674 Chem 288, 29260-29266.

675 Schwieters, C.D., Kuszewski, J.J., and Clore, G.M. (2006). Using Xplor-NIH for NMR  
676 molecular structure determination. Prog Nucl Mag Res Spect 48, 47-62.

677 Shen, Y., Delaglio, F., Cornilescu, G., and Bax, A. (2009). TALOS+: a hybrid method  
678 for predicting protein backbone torsion angles from NMR chemical shifts. J Biomol  
679 NMR 44, 213-223.

680 Theobald, D.L., and Wuttke, D.S. (2008). Accurate structural correlations from  
681 maximum likelihood superpositions. PLoS Comput Biol 4, e43.

682 Wang, F., Coureuil, M., Osinski, T., Orlova, A., Altindal, T., Gesbert, G., Nassif, X.,  
683 Egelman, E.H., and Craig, L. (2017). Cryoelectron microscopy reconstructions of the  
684 *Pseudomonas aeruginosa* and *Neisseria gonorrhoeae* type IV pili at sub-nanometer  
685 resolution. Structure 25, 1423-1435.

686 Waterhouse, A., Bertoni, M., Bienert, S., Studer, G., Tauriello, G., Gumienny, R.,  
687 Heer, F.T., de Beer, T.A.P., Rempfer, C., Bordoli, L., *et al.* (2018). SWISS-MODEL:  
688 homology modelling of protein structures and complexes. Nucleic Acids Res 46,  
689 W296-W303.

690 **LEGENDS TO FIGURES**

691

692 **Fig. 1. Com (pseudo)pilus machinery in *S. sanguinis*.** (A) Genomic organisation  
693 of the genes involved in the biogenesis of the Com (pseudo)pilus in *S. sanguinis*  
694 2908. All the genes are drawn to scale, with the scale bar representing 500 bp. The  
695 names of the corresponding proteins are listed at the bottom. (B) Sequence  
696 alignment of the putative N-terminal class III signal peptides of the five ComG pilins  
697 in *S. sanguinis* 2908. The 8-15 aa-long leader peptides, which contain a majority of  
698 hydrophilic (shaded in grey) or neutral (no shading) residues, end with a conserved  
699 Ala<sub>-1</sub>. Leader peptides are processed (indicated by the vertical arrow) by the prepilin  
700 peptidase ComC. The mature proteins start with a tract of 21 predominantly  
701 hydrophobic residues (shaded in black), which invariably form the protruding N-  
702 terminal portion of an extended  $\alpha$ -helix that is the main assembly interface within  
703 filaments.

704

705 **Fig. 2. Global sequence analysis of ComGC pilins.** Sequence alignments of  
706 ComGC in *S. sanguinis* and *S. pneumoniae* is represented in the top two rows.  
707 Residues were shaded in black (identical), grey (conserved) or unshaded (different).  
708 The leader peptide is highlighted. In the recombinant proteins that were produced for  
709 structure determination, the N-terminal 22 residues invariably forming a protruding  
710 hydrophobic  $\alpha$ -helix were truncated (depicted by an arrow) to promote solubility. The  
711 2D structural motifs predicted using JPred are depicted in the third row. Fourth and  
712 fifth rows represent the 80 and 90% ComGC consensus sequences, computed from  
713 2,809 ComGC entries in InterPro, and aligned to ComGC<sub>SS</sub> and ComGC<sub>SP</sub>. Multiple  
714 alignments were generated using Clustal Omega and formatted with MView. Polar:  
715 C, D, E, H, K, N, Q, R, S or T. Tiny: A or G. Hydrophobic: A, C, F, G, H, I, K, L, M, R,  
716 T, V, W or Y. Aliphatic: I, L or V. Turn-like: A, C, D, E, G, H, K, N, Q, R, S or T. Small:  
717 A, C, D, G, N, P, S, T or V.

718

719 **Fig. 3. Rooted phylogeny of the major pilins from various bacterial Tff.** The tree  
720 was build using IQ-Tree, with 1,000 replicates of UFBoot and LG+F+R4 model.  
721 Numeric values (in %) indicate UFBoot of the corresponding branches. The colour of  
722 the bullet points indicates the taxonomic group of the corresponding species. The  
723 colour of the strips and highlights indicate the classification of the different Tff  
724 systems. Tfpa: type IVa pilus. Tfpb: type IVb pilus. Tfpc: type IVc pilus (also known  
725 as Tad). MSH: mannose-sensitive hemagglutinin pilus. Com: competence  
726 (pseudo)pilus. T2SS: type II secretion system pseudopilus.

727

728 **Fig. 4. 3D solution structure of ComGC<sub>SS</sub>.** (A) Cartoon representation of the  
729 ComGC<sub>SS</sub> structure: face and side views are shown. A dimmed surface  
730 representation of the protein is superimposed. The three consecutive  $\alpha$ -helices have  
731 been named  $\alpha 1$ ,  $\alpha 2$  and  $\alpha 3$ , and highlighted in blue ( $\alpha 1$ ) or cyan ( $\alpha 2$  and  $\alpha 3$ ). (B)  
732 Cartoon representation of the superposition of the ensemble of 10 ComGC<sub>SS</sub>  
733 structures determined by NMR, which highlights that there is no significant flexibility  
734 in the structure except for the unstructured N-terminus.

735

736 **Fig. 5. 3D solution structure of ComGC<sub>SP</sub>.** (A) Cartoon representation of the  
737 ComGC<sub>SP</sub> structure: face and side views are shown. A dimmed surface  
738 representation of the protein is superimposed. Nomenclature and colour scheme are  
739 the same than in Fig. 4. (B) Cartoon representation of the superposition of the  
740 ensemble of 10 ComGC<sub>SP</sub> structures determined by NMR, (C) Cartoon  
741 representation of the overlay of ComGC<sub>SP</sub> and ComGC<sub>SS</sub> representative structures.  
742 This highlights the high structural similarity between the two proteins, with 1.54 Å  
743 RMSD for the helical regions.

744



745 **Fig. 6. Conserved residues contributing to the globular fold of ComGC.** Cartoon  
746 representation of the ordered portion of ComGC<sub>SS</sub>, where residues determined to be  
747 on the interior using GETAREA - with accessible surface accessibility ratios of less  
748 than 20% - are highlighted in orange. The consensus residues Val<sub>43</sub>, Gln<sub>46</sub>, Tyr<sub>50</sub>,  
749 Leu<sub>64</sub> and Ile<sub>70</sub> are shown with space filling representation.

750

751 **Fig. 7. ComGC display a novel type IV pilin fold.** 3D structure of the three different  
752 structural types of type IV pilins identified so far. The canonical type IV pilin fold is  
753 represented by the major pilin of TfpA in *N. gonorrhoeae* (PDB 2PIL). *G.*  
754 *sulfurreducens* TfpA pilin (PDB 2M7G) is the representative member of the very short  
755 pilins almost exclusively consisting of  $\alpha 1$ . The full-length 3D structure of ComGC<sub>SS</sub> has  
756 been modelled. The conserved  $\alpha 1$  in all three sub-types is highlighted in blue.  
757 Distinctive structural features in the globular heads of PilE (antiparallel  $\beta$ -sheet) and  
758 ComGC (antiparallel  $\alpha 2$ - $\alpha 3$  orthogonal to  $\alpha 1$ ) have been highlighted in cyan.

759

760 **Fig. 8 3D model of ComGC filaments.** The cryo-EM structure of the *K. oxytoca*  
761 PulG T2SS pseudopilus (PDB 5WDA) has been used as a template to generate  
762 models of ComGC<sub>SS</sub> (pseudo)pili. **(A)** Full-length ComGC<sub>SS</sub> in filaments with a melted  
763 segment in  $\alpha 1$ N and an N-terminal methyl-Phe<sub>1</sub>. **(B)** ComGC<sub>SS</sub> (pseudo)pili with a  
764 right-handed helical packing of the conserved  $\alpha 1$ -helices which run approximately  
765 parallel to each other in the filament core. **(C)** Top and bottom views of ComGC<sub>SS</sub>  
766 (pseudo)pili highlighting the extensive interactions between  $\alpha 1$ -helices and the  
767 globular heads forming the outer surface of the filaments.

768 **Table 1. NMR structural statistics.**

|                                                  | <b>ComGC<sub>SS</sub></b> | <b>ComGC<sub>SP</sub></b> |
|--------------------------------------------------|---------------------------|---------------------------|
| <b>NOE-derived distance constraints</b>          |                           |                           |
| long [(i-j) > 5]                                 | 128                       | 95                        |
| medium [ $5 \geq (i-j) > 1$ ]                    | 414                       | 404                       |
| intraresidue (i=j)                               | 420                       | 381                       |
| total                                            | 962                       | 880                       |
| hydrogen bonds                                   | 50                        | 54                        |
| dihedral constraints ( $\Phi$ and $\Psi$ )       | 110                       | 102                       |
| residual dipolar couplings (RDC)                 | 39                        | 38                        |
| <b>Ramachandran statistics (from PROCHECK)</b>   |                           |                           |
| most favoured (%)                                | 93.4                      | 83.0                      |
| additionally allowed (%)                         | 6.4                       | 15.9                      |
| generously allowed (%)                           | 0.2                       | 1.1                       |
| disallowed (%)                                   | 0.0                       | 0.0                       |
| <b>Structure statistics</b>                      |                           |                           |
| RMSD backbone (all residues)                     | 3.3                       | 4.0                       |
| RMSD backbone (ordered residues*)                | 0.6                       | 0.8                       |
| RMS bond angles ( $^{\circ}$ )                   | 1.8                       | 1.9                       |
| RMS bond lengths ( $\text{\AA}$ )                | 0.012                     | 0.017                     |
| <b>Restraint statistics (RMSD of violations)</b> |                           |                           |
| NOE restraints                                   | 0.060 $\pm$ 0.003         | 0.179 $\pm$ 0.008         |
| hydrogen bonds                                   | 0.075 $\pm$ 0.015         | 0.100 $\pm$ 0.017         |
| dihedral restraints                              | 1.805 $\pm$ 0.075         | 1.827 $\pm$ 0.318         |
| RDC                                              | 0.748 $\pm$ 0.138         | 0.716 $\pm$ 0.256         |
| Q value                                          | 0.146 $\pm$ 0.028         | 0.150 $\pm$ 0.054         |

769 \*PROCHECK ordered residues are 37-53, 61-66 and 72-85 for ComGC<sub>SS</sub>, and 36-

770 54, 60-65 and 71-82 for ComGC<sub>SP</sub>.

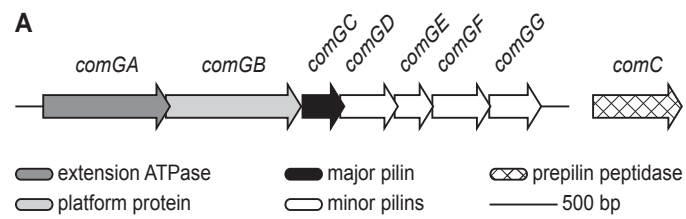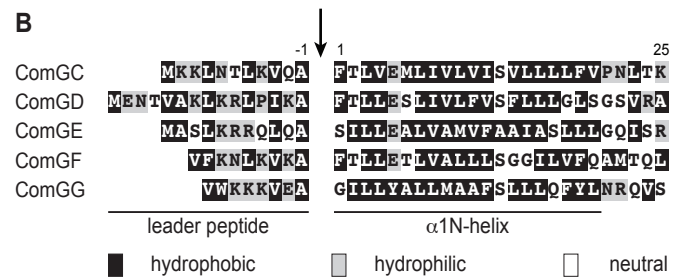



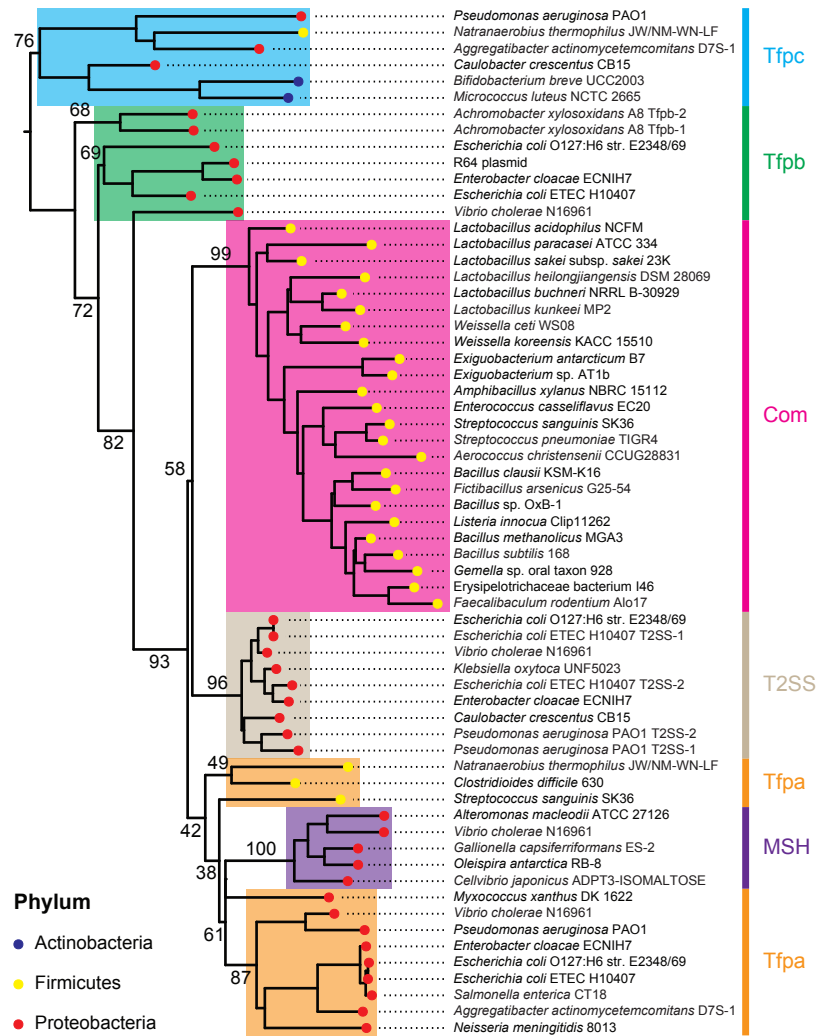

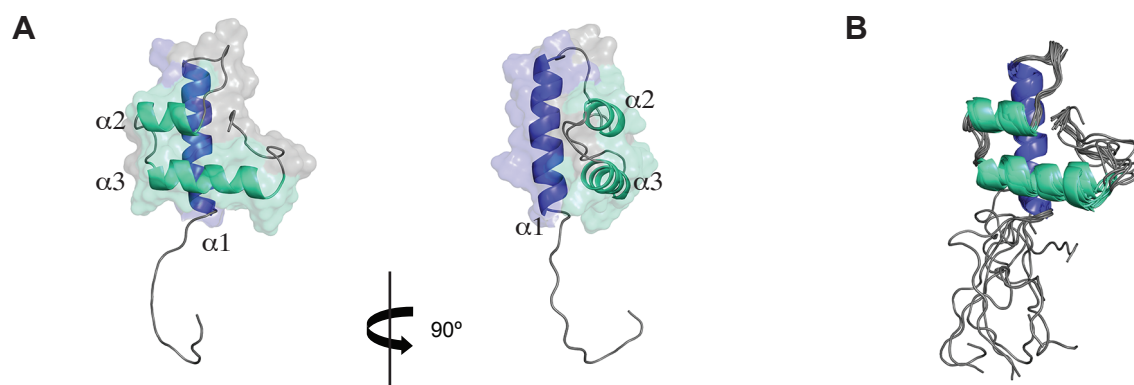

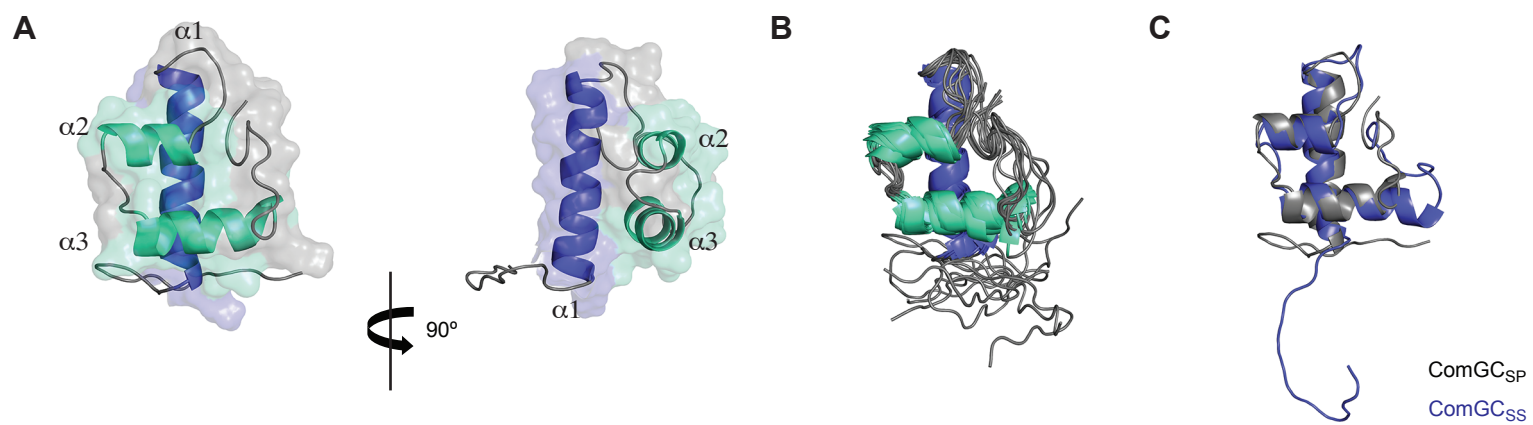

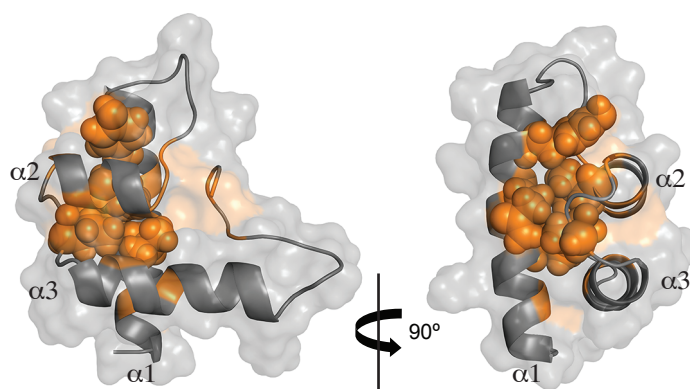



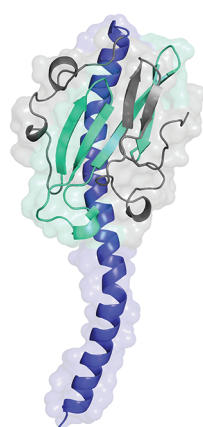

*N. gonorrhoeae*  
PiIE

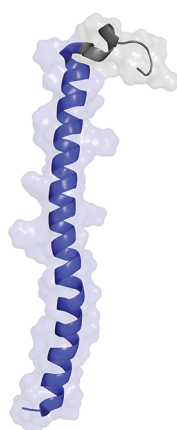

*G. sulfurreducens*  
PiIE

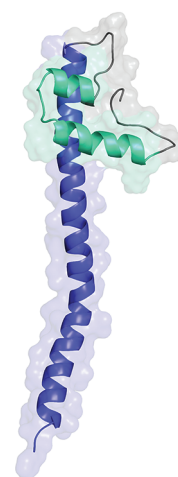

*S. sanguinis*  
ComGC

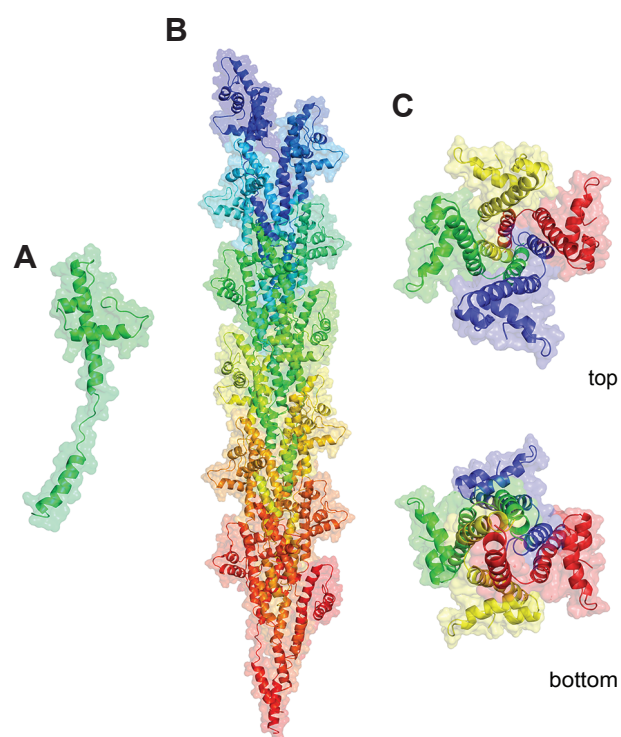

Source: https://www.biorxiv.org/content/10.1101/2020.02.12.945410v1.full.pdf
